# Supplementary material
Source: PubMed Central journal article supplement (PMC3287117)

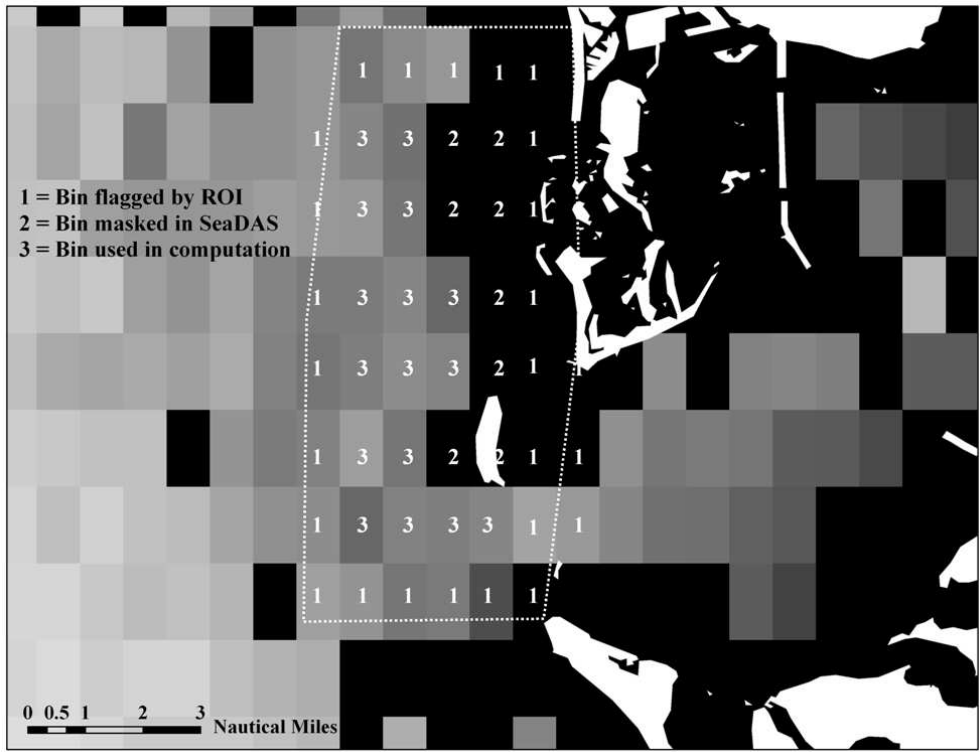

72x55mm (350 x 350 DPI)

Supplement: es2014105_si_001.pdf [file es2014105_si_001.pdf]

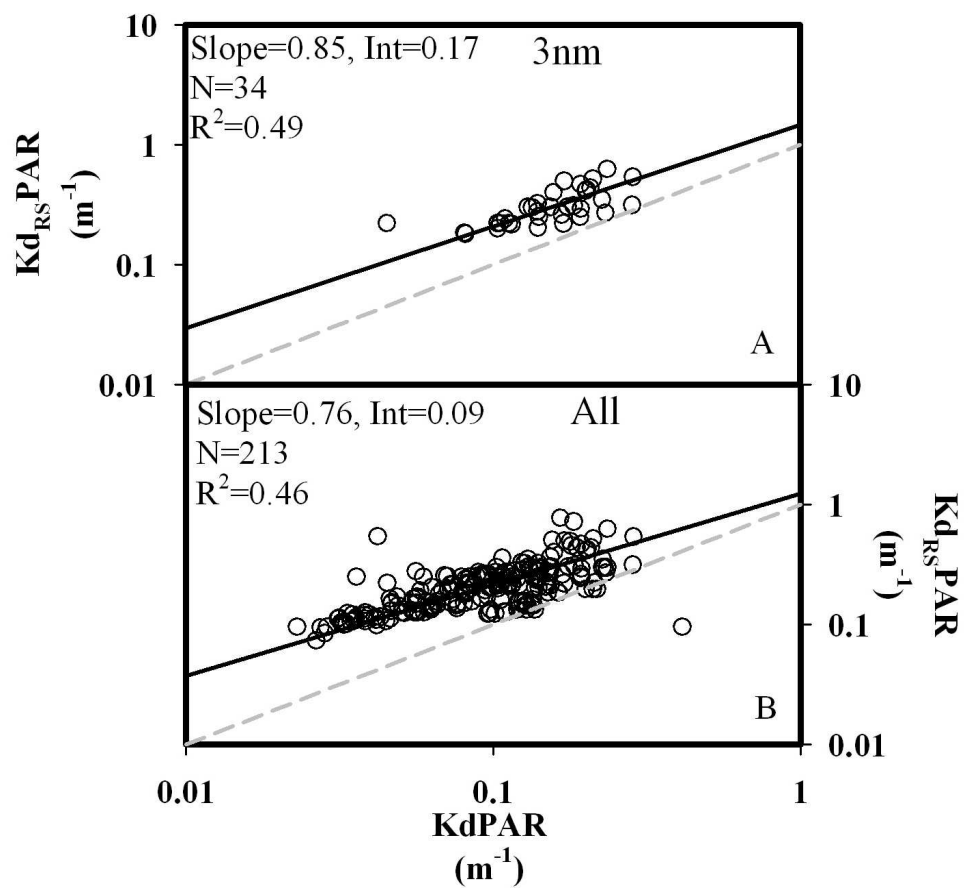

123x112mm (300 x 300 DPI)

Supplement: es2014105_si_002.pdf [file es2014105_si_002.pdf]

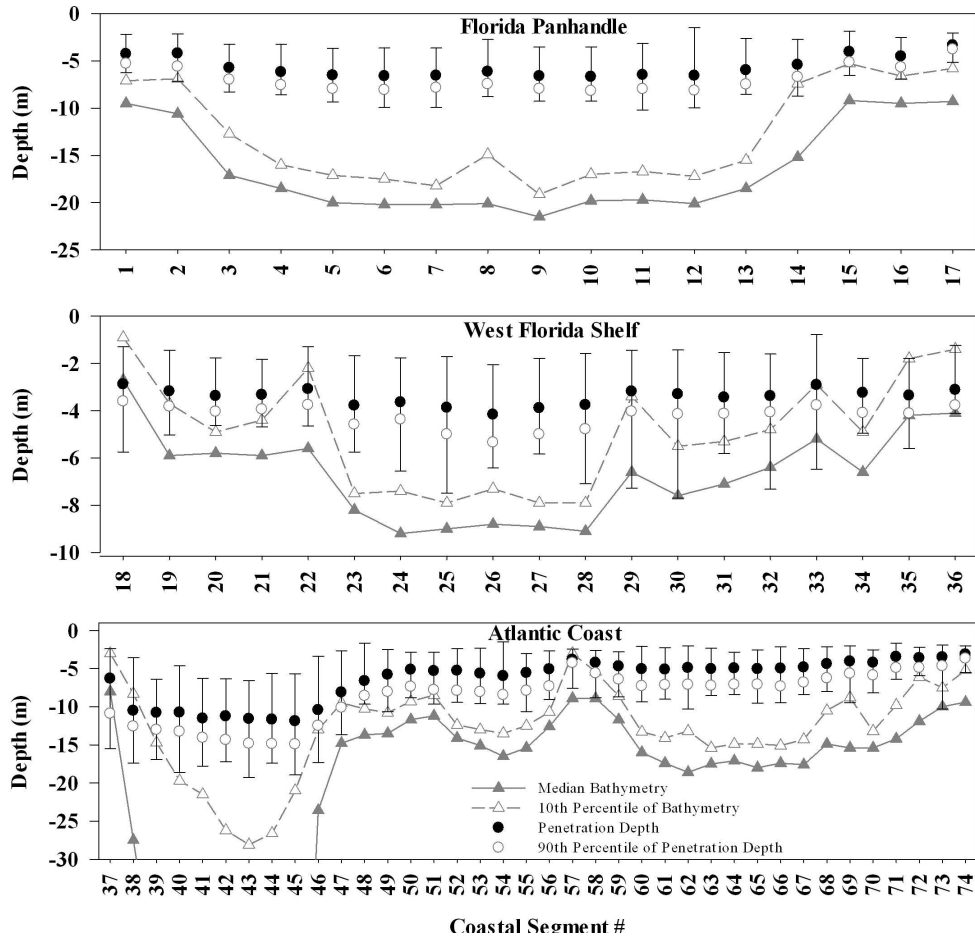

187x174mm (300 x 300 DPI)

Supplement: es2014105_si_003.pdf [file es2014105_si_003.pdf]

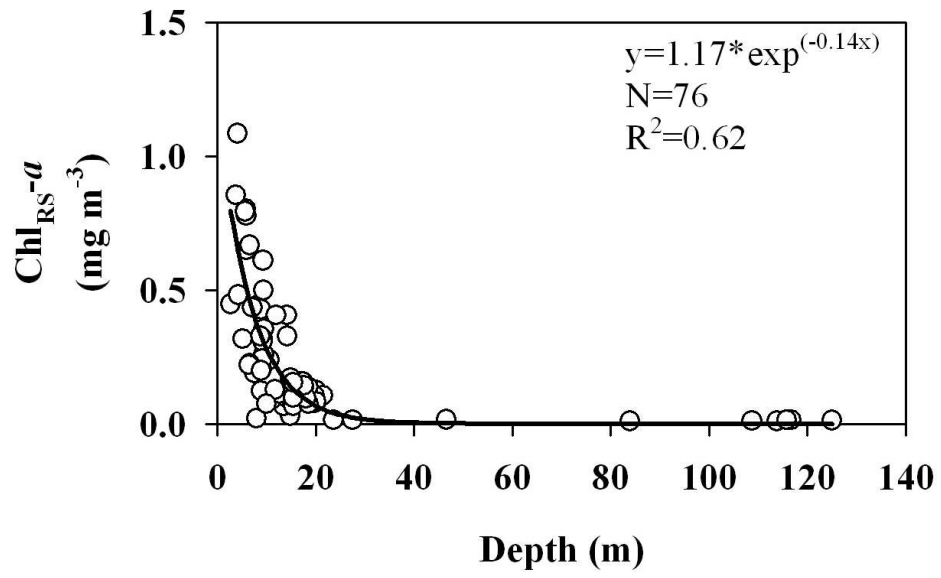

110x72mm (300 x 300 DPI)

Supplement: es2014105_si_004.pdf [file es2014105_si_004.pdf]

Tampa Bay Coastal Segment 22

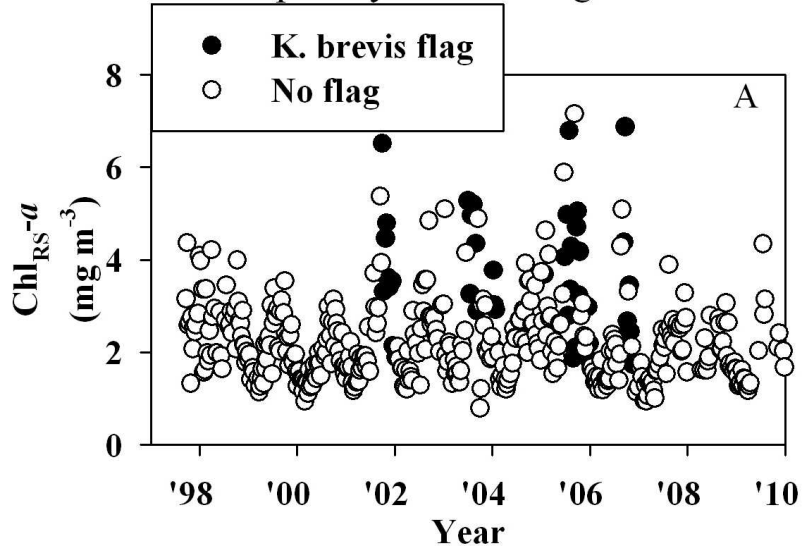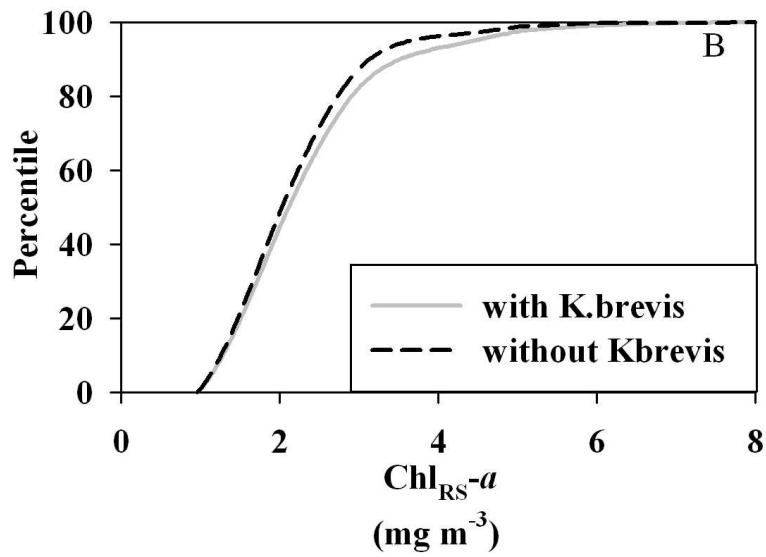

100x144mm (300 x 300 DPI)

Supplement: es2014105_si_005.pdf [file es2014105_si_005.pdf]

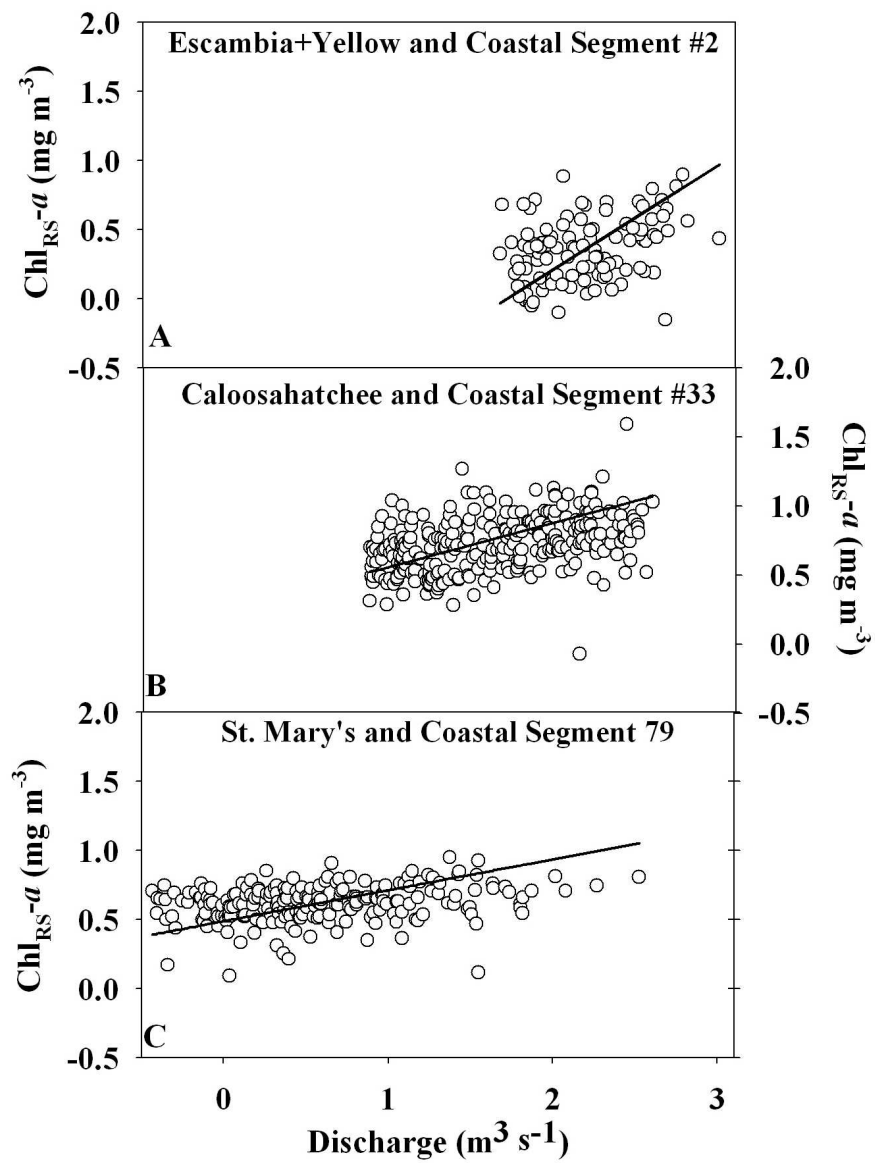

114x154mm (300 x 300 DPI)

Supplement: es2014105_si_006.pdf [file es2014105_si_006.pdf]
